# Supplementary material
Source: PubMed Central journal article supplement (PMC4286596)
Supplement: mmc1.pdf [file mmc1.pdf]

# Synonymous mutations reduce genome compactness in icosahedral ssRNA viruses

Luca Tubiana\*

*Department of Theoretical Physics, Jožef Stefan Institute, SI-1000 Ljubljana, Slovenia*

Anže Lošdorfer Božič

*Department of Theoretical Physics, Jožef Stefan Institute, SI-1000 Ljubljana, Slovenia and  
Max Planck Institute for Biology of Ageing, Joseph-Stelzmann-Str. 9b, D-50931 Cologne, Germany*

Cristian Micheletti

*SISSA, Via Bonomea 265, I-34136 Trieste, Italy*

Rudolf Podgornik

*Department of Theoretical Physics, Jožef Stefan Institute, SI-1000 Ljubljana, Slovenia*

*Department of Physics, Faculty of Mathematics and Physics,*

*University of Ljubljana, SI-1000 Ljubljana, Slovenia and*

*Department of Physics, University of Massachusetts, Amherst, MA 01003*

(Dated: October 13, 2014)

---

\* luca.tubiana@ijs.si; Corresponding author

## I. FIT OF THE SHUFFLED RNA MLD

To obtain the power law for the MLD of random RNAs, we shuffled 12 RNA sequences of different lengths (1000 nt, 1500 nt, ..., 6000 nt), all having a viral-like nucleotide composition: 0.26 A, 0.28 U, 0.24 G, 0.22 C (obtained excluding Tymoviridae, which have a significantly different composition). For every sequence length, we produced 500 independent sequences over which we computed the expected (thermally averaged)  $\langle \text{MLD} \rangle$ . The power law of Eq. (1) in the main text is then obtained by fitting the dependence of  $\langle \text{MLD} \rangle$ , further averaged over the 500 different mutations, on the sequence length.

As already mentioned in the main text, Tymoviridae differ notably from the other families in their nucleotide composition, and they were not considered when producing the averaged viral-like composition. Evaluating the average composition for the set of Tymoviridae viruses considered in the main text, we obtain 0.20 A, 0.24 U, 0.18 G, 0.38 C.

Using this alternative composition and adopting the same procedure used for the other families we obtain a scaling law describing the  $\langle \text{MLD} \rangle$  dependence of Tymoviridae-like random RNA sequences:

$$\overline{\langle \text{MLD} \rangle}_{\text{Ty}}(N) = (0.92 \pm 0.44) \times N^{(0.669 \pm 0.054)}. \quad (1)$$

Note that the exponent,  $0.669 \pm 0.054$ , is compatible with the one obtained for the other viral families,  $0.662 \pm 0.004$ . Both fits are shown in Fig. S1.

We further check the validity of the scaling laws for our viral families by randomly shuffling the WT RNA sequences themselves, without any further constraints. The results, shown in Fig. S2, show once again that the two scaling laws are a good reference for random RNAs with the viral-like composition considered in our sample. For Tymoviridae, we notice that a couple of viruses remain more compact than predicted by Eq. (S1). This is due to them having a composition which is substantially different from the Tymoviridae average composition.

## II. MUTATIONS PRESERVING UTRS

As detailed in the main text, we further tested the robustness of our results by adding additional optional constraint as the preservation of Untranslated regions (UTRs) near the ends of the genome and the preservation of the codon

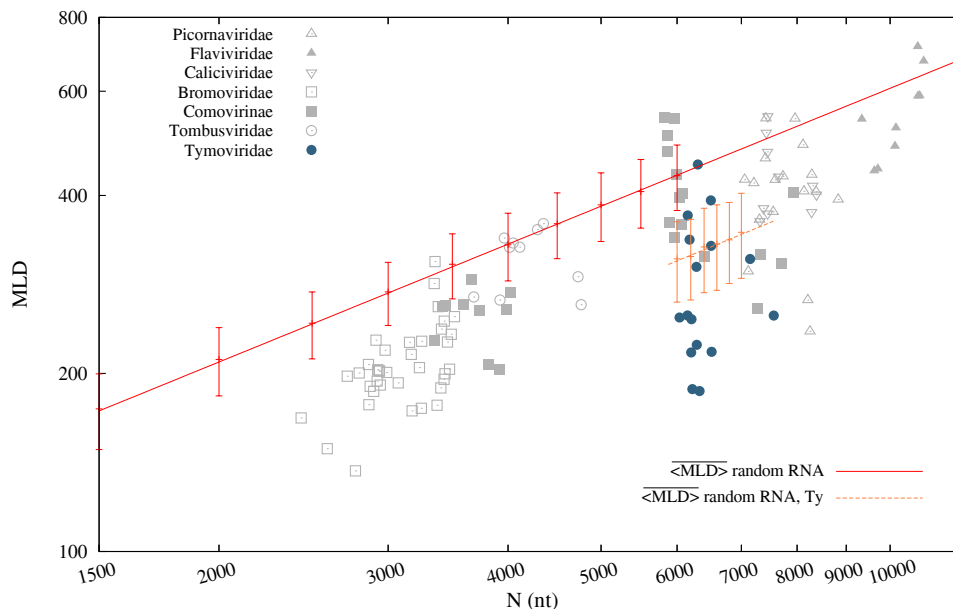

SI Fig. 1.  $\langle \text{MLD} \rangle$  values of WT RNA genomes are shown in gray for all families apart from Tymoviridae, which are highlighted in blue.  $\langle \text{MLD} \rangle$  values of random sequences are shown with red and orange errorbars for viral-like and Tymoviridae-like nucleotide composition, respectively. The respective fitting lines are displayed with the same colors. The  $p$ -value of the fit parameters for the viral-like composition is below  $10^{-10}$ , and the adjusted  $R^2$  is 0.999948. For Tymoviridae-like composition the  $p$ -value of exponent is  $\simeq 10^{-4}$  and the adjusted  $R^2$  is 0.999968.

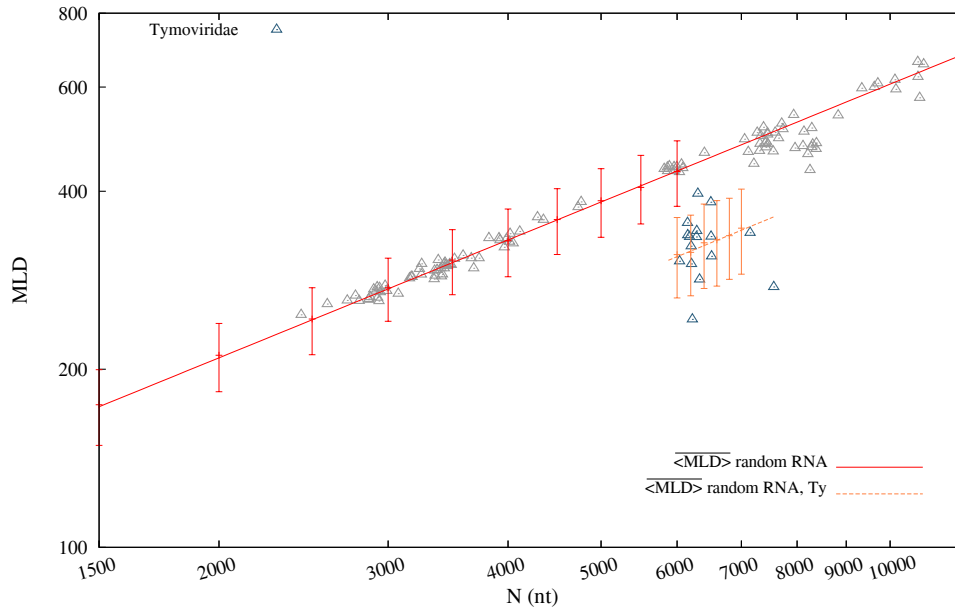

SI Fig. 2.  $\langle \text{MLD} \rangle$  values of randomly shuffled WT RNA genomes, shown in gray for all families apart from Tymoviridae, which are highlighted in blue.  $\langle \text{MLD} \rangle$  values of random sequences are shown with red and orange errorbars for viral-like and Tymoviridae-like nucleotide composition, respectively.

biases within each gene. The  $\langle \text{MLD} \rangle$  values obtained with these additional constraint are compared with those obtained under the constraint of synonymous mutations only in Fig. 5 in the main text. Here, in Fig. S3 we extend the comparison for the additional constraint of preserving UTRs to include Tymoviridae.  $\langle \text{MLD} \rangle$  values under the additional constraint of fixed codon bias were not calculated for this family since all the tymoviridae genomes in our set present overlapping genes.

### III. MUTATIONS AT FIXED NUCLEOTIDE COMPOSITION

To test the robustness of the results reported in the main text, we implemented another mutation flow which conserves the nucleotide composition instead of the dinucleotide frequencies. This is achieved by using a Fisher-Yates algorithm where proposed shuffles are accepted or rejected on the basis of whether or not the resulting genome still encodes for the same proteins. The results of this different simulation setup are shown in Fig. S4.

Note that the values of  $\langle \text{MLD} \rangle$  obtained in this way show a clear correlation with those obtained by unrestricted random shuffling of the WT RNA sequences, shown in Fig. S2.

### IV. DETAILS OF DINUCLEOTIDE AND NUCLEOTIDE COMPOSITIONS

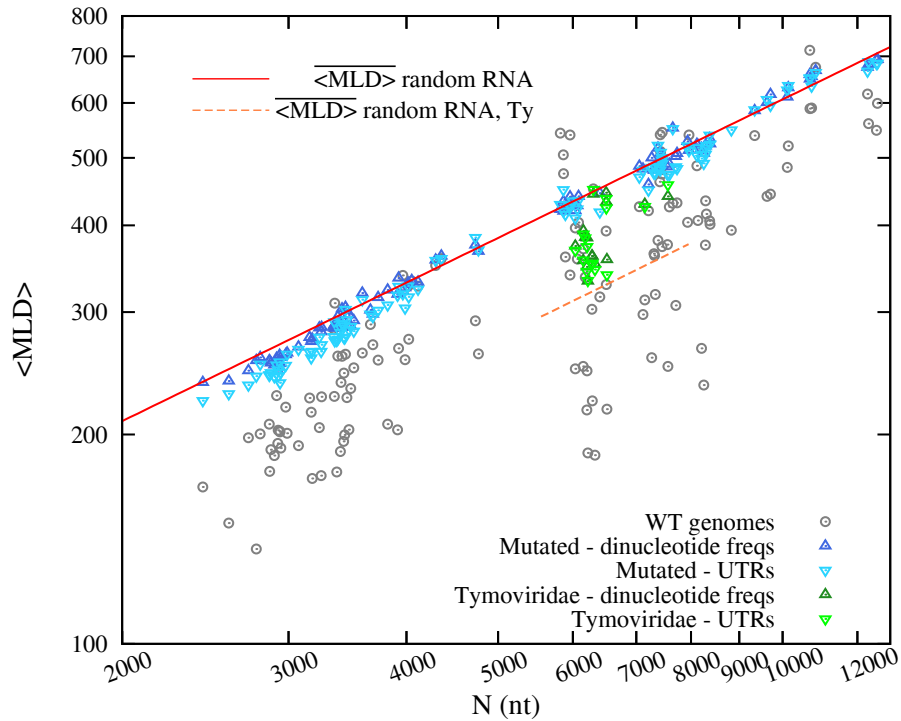

SI Fig. 3. Comparison between the  $\overline{\langle \text{MLD} \rangle}$  values for the synonymous constraint only (upward triangles) and for the additional constraints of preserving UTRs sequences (downward triangles), including Tymoviridae. In the latter case  $\overline{\langle \text{MLD} \rangle}$  have been evaluated over a set of 150 mutated sequences per virus.

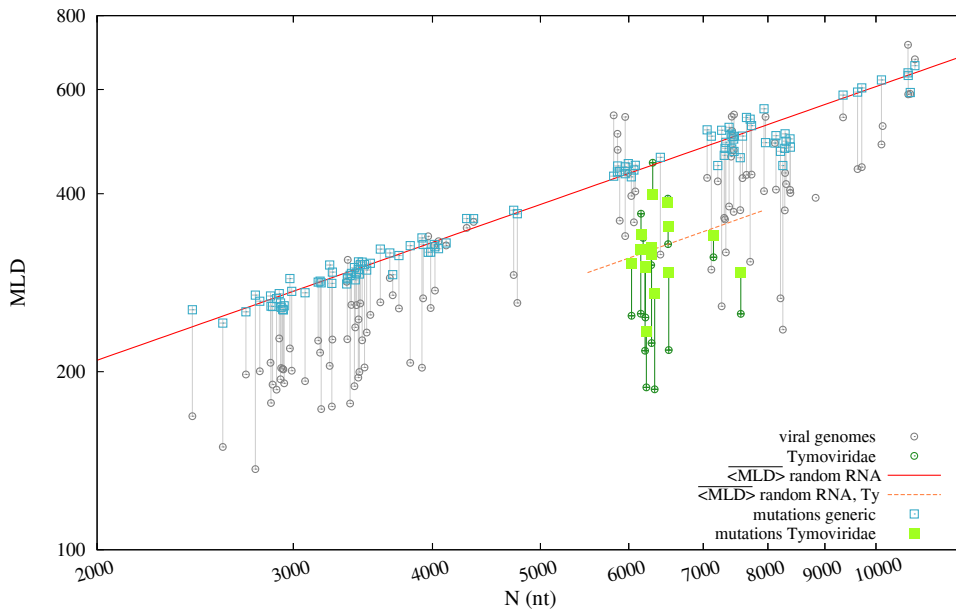

SI Fig. 4. Mutations performed at fixed nucleotide composition. Note that the  $\overline{\langle \text{MLD} \rangle}$  of the mutated viral sequences approaches the random RNA values for viral-like and Tymoviridae-like nucleotide composition in both respective cases. We note that for Tymoviridae there are some viruses which remain more compact than the corresponding random RNAs. We argue that this is due to the fact that Tymoviridae show notable fluctuations in their nucleotide composition.

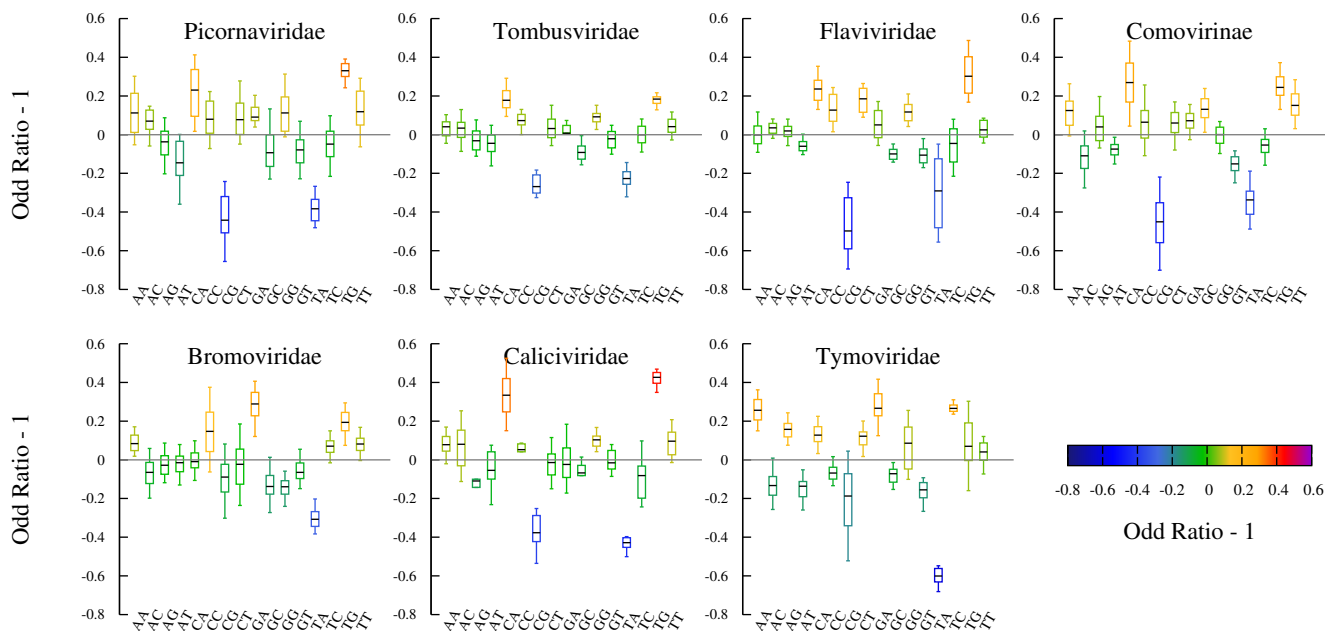

SI Fig. 5. Dinucleotide odd-ratios, rescaled to zero, for the viral families considered in our study. Boxes represent quartiles, and whiskers correspond to 1.5 of the interquartile distance. These values have been used to constrain the mutation flow and produce sequences with viral-like dinucleotide frequencies, see Materials and Methods section in the main text.

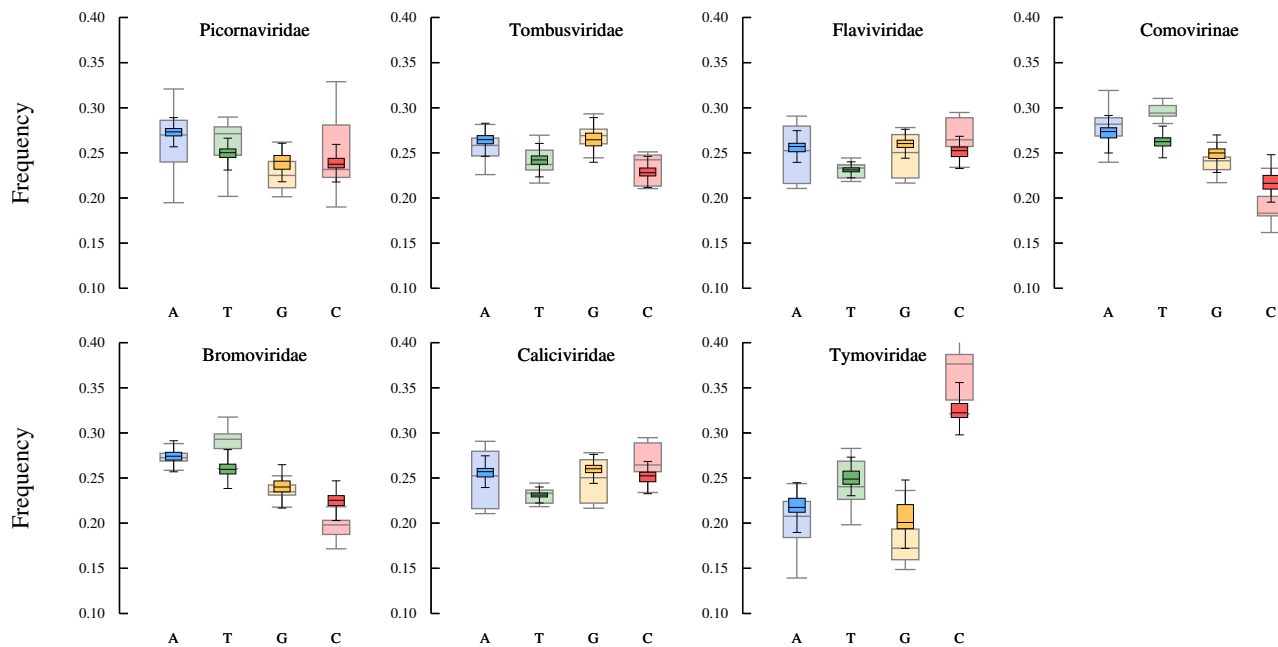

SI Fig. 6. Nucleotide frequencies for WT sequences (large boxes) and mutated sequences with constrained dinucleotide composition (small boxes), shown for each virus family considered in our study. Note that in most families the imposition of conserved dinucleotide frequencies results in conserved nucleotide frequencies as well, although for Tymoviridae, Comovirinae, and Bromoviridae the frequencies are not so well preserved, showing the effects of transversion changes.

## V. DATASET OF VIRAL GENOMES

| Taxon         | Family      | Nucore code     | PDB code | length | $\langle \text{MLD} \rangle_{WT}$ | $\langle \text{MLD} \rangle_{mut}$ | $\langle \text{MLD} \rangle_{UTRs}$ | $\langle \text{MLD} \rangle_{CB}$ |
|---------------|-------------|-----------------|----------|--------|-----------------------------------|------------------------------------|-------------------------------------|-----------------------------------|
| Bromoviridae  | Anulavirus  | PeZSV_RNA1      | –        | 3383   | 259 ± 19                          | 295 ± 48                           | 274 ± 45                            | 280 ± 43                          |
| Bromoviridae  | Anulavirus  | PeZSV_RNA2      | –        | 2435   | 168 ± 8                           | 238 ± 39                           | 224 ± 37                            | 235 ± 38                          |
| Bromoviridae  | Bromovirus  | BMV_RNA1        | 1js9     | 3234   | 204 ± 15                          | 285 ± 46                           | 276 ± 43                            | 278 ± 46                          |
| Bromoviridae  | Bromovirus  | BMV_RNA2        | 1js9     | 2865   | 177 ± 12                          | 255 ± 42                           | 244 ± 38                            | 242 ± 40                          |
| Bromoviridae  | Bromovirus  | BrBMV_RNA1      | –        | 3158   | 225 ± 21                          | 276 ± 44                           | 263 ± 43                            | 264 ± 42                          |
| Bromoviridae  | Bromovirus  | BrBMV_RNA2      | –        | 2799   | 200 ± 17                          | 258 ± 43                           | 252 ± 40                            | 255 ± 43                          |
| Bromoviridae  | Bromovirus  | CaYBV_RNA1      | –        | 3178   | 172 ± 14                          | 274 ± 45                           | 263 ± 40                            | 270 ± 45                          |
| Bromoviridae  | Bromovirus  | CaYBV_RNA2      | –        | 2720   | 197 ± 20                          | 247 ± 41                           | 236 ± 40                            | 239 ± 39                          |
| Bromoviridae  | Bromovirus  | CCMV_RNA1       | 1cwp     | 3171   | 215 ± 27                          | 272 ± 44                           | 258 ± 40                            | 267 ± 44                          |
| Bromoviridae  | Bromovirus  | CCMV_RNA2       | 1cwp     | 2774   | 136 ± 11                          | 256 ± 43                           | 243 ± 38                            | 249 ± 40                          |
| Bromoviridae  | Bromovirus  | MeYFV_RNA1      | –        | 3249   | 174 ± 19                          | 281 ± 46                           | 263 ± 44                            | 274 ± 47                          |
| Bromoviridae  | Bromovirus  | MeYFV_RNA2      | –        | 2862   | 207 ± 11                          | 255 ± 40                           | 243 ± 38                            | 241 ± 37                          |
| Bromoviridae  | Bromovirus  | SpBLV_RNA1      | –        | 3252   | 226 ± 25                          | 285 ± 45                           | 269 ± 43                            | 281 ± 47                          |
| Bromoviridae  | Bromovirus  | SpBLV_RNA2      | –        | 2898   | 186 ± 16                          | 252 ± 41                           | 242 ± 40                            | 259 ± 39                          |
| Bromoviridae  | Cucumovirus | GaMMV_RNA1      | –        | 3350   | 283 ± 28                          | 286 ± 47                           | 277 ± 43                            | 278 ± 44                          |
| Bromoviridae  | Cucumovirus | GaMMV_RNA2      | –        | 2935   | 202 ± 8                           | 260 ± 43                           | 254 ± 39                            | 257 ± 42                          |
| Bromoviridae  | Cucumovirus | PeSV_RNA1       | –        | 3357   | 309 ± 16                          | 287 ± 46                           | 273 ± 44                            | 273 ± 42                          |
| Bromoviridae  | Cucumovirus | TAV_RNA1        | 1laj     | 3410   | 237 ± 18                          | 287 ± 46                           | 285 ± 44                            | 281 ± 49                          |
| Bromoviridae  | Cucumovirus | TAV_RNA2        | 1laj     | 3074   | 192 ± 18                          | 267 ± 43                           | 265 ± 42                            | –                                 |
| Bromoviridae  | Illarvirus  | ApMV_RNA1       | –        | 3476   | 203 ± 36                          | 297 ± 49                           | 283 ± 45                            | 292 ± 49                          |
| Bromoviridae  | Illarvirus  | ApMV_RNA2       | –        | 2979   | 218 ± 20                          | 261 ± 43                           | 251 ± 43                            | 261 ± 45                          |
| Bromoviridae  | Illarvirus  | CiLRV_RNA1      | –        | 3404   | 189 ± 27                          | 289 ± 46                           | 281 ± 48                            | 289 ± 4                           |
| Bromoviridae  | Illarvirus  | CiLRV_RNA2      | –        | 2990   | 200 ± 21                          | 262 ± 43                           | 261 ± 42                            | –                                 |
| Bromoviridae  | Illarvirus  | CiVV_RNA1       | –        | 3433   | 245 ± 17                          | 291 ± 48                           | 287 ± 45                            | 290 ± 42                          |
| Bromoviridae  | Illarvirus  | CiVV_RNA2       | –        | 2914   | 227 ± 29                          | 257 ± 41                           | 252 ± 40                            | –                                 |
| Bromoviridae  | Illarvirus  | ELMV_RNA1       | –        | 3431   | 195 ± 11                          | 285 ± 46                           | 276 ± 41                            | 279 ± 44                          |
| Bromoviridae  | Illarvirus  | ELMV_RNA2       | –        | 2874   | 190 ± 25                          | 254 ± 41                           | 246 ± 43                            | –                                 |
| Bromoviridae  | Illarvirus  | ParMV_RNA1      | –        | 3518   | 249 ± 20                          | 292 ± 48                           | 282 ± 44                            | 301 ± 50                          |
| Bromoviridae  | Illarvirus  | ParMV_RNA2      | –        | 2922   | 194 ± 21                          | 247 ± 40                           | 248 ± 39                            | –                                 |
| Bromoviridae  | Illarvirus  | PrDV_RNA1       | –        | 3374   | 176 ± 24                          | 285 ± 46                           | 273 ± 42                            | 275 ± 47                          |
| Bromoviridae  | Illarvirus  | PrDV_RNA2       | –        | 2593   | 149 ± 17                          | 239 ± 39                           | 229 ± 37                            | 232 ± 39                          |
| Bromoviridae  | Illarvirus  | SpLV_RNA1       | –        | 3439   | 199 ± 19                          | 291 ± 48                           | 275 ± 44                            | 291 ± 46                          |
| Bromoviridae  | Illarvirus  | SpLV_RNA2       | –        | 2939   | 201 ± 22                          | 253 ± 40                           | 237 ± 37                            | –                                 |
| Bromoviridae  | Illarvirus  | ToSV_RNA1       | –        | 3491   | 232 ± 28                          | 286 ± 46                           | 286 ± 48                            | 283 ± 46                          |
| Bromoviridae  | Illarvirus  | ToSV_RNA2       | –        | 2926   | 202 ± 15                          | 253 ± 42                           | 243 ± 40                            | –                                 |
| Bromoviridae  | Illarvirus  | TuAMV_RNA1      | –        | 3459   | 226 ± 17                          | 301 ± 48                           | 292 ± 47                            | 300 ± 48                          |
| Bromoviridae  | Illarvirus  | TuAMV_RNA2      | –        | 2944   | 191 ± 9                           | 258 ± 41                           | 246 ± 40                            | –                                 |
| Caliciviridae | Nebovirus   | caliciNB        | –        | 7453   | 473 ± 48                          | 502 ± 79                           | 501 ± 77                            | 498 ± 83                          |
| Caliciviridae | Nebovirus   | newbury         | –        | 7454   | 372 ± 18                          | 495 ± 78                           | 496 ± 82                            | 498 ± 83                          |
| Caliciviridae | Norovirus   | murineNoro1     | –        | 7382   | 380 ± 36                          | 517 ± 81                           | 521 ± 82                            | 491 ± 83                          |
| Caliciviridae | Norovirus   | norwalk         | 1ihm     | 7654   | 430 ± 35                          | 552 ± 84                           | 551 ± 77                            | –                                 |
| Caliciviridae | Sapovirus   | porcineSapo     | –        | 7320   | 361 ± 36                          | 480 ± 77                           | 486 ± 73                            | –                                 |
| Caliciviridae | Sapovirus   | sapoMc10        | –        | 7458   | 544 ± 39                          | 486 ± 78                           | 491 ± 73                            | –                                 |
| Caliciviridae | Sapovirus   | saporo          | –        | 7429   | 510 ± 33                          | 508 ± 79                           | 509 ± 79                            | –                                 |
| Caliciviridae | Vesivirus   | rabbitVV        | –        | 8380   | 401 ± 20                          | 524 ± 81                           | 523 ± 82                            | –                                 |
| Caliciviridae | Vesivirus   | stellerVV       | –        | 8305   | 415 ± 16                          | 508 ± 79                           | 521 ± 77                            | –                                 |
| Caliciviridae | Vesivirus   | VESV            | –        | 8284   | 374 ± 41                          | 516 ± 76                           | 516 ± 78                            | –                                 |
| Comovirinae   | Comovirus   | BPMV_RNA1       | 1bmrv    | 5995   | 433 ± 40                          | 430 ± 67                           | 434 ± 72                            | 443 ± 66                          |
| Comovirinae   | Comovirus   | BPMV_RNA2       | 1bmrv    | 3662   | 288 ± 26                          | 302 ± 49                           | 298 ± 48                            | 302 ± 50                          |
| Comovirinae   | Comovirus   | CowSMV_RNA1     | –        | 5957   | 339 ± 28                          | 427 ± 69                           | 425 ± 63                            | 430 ± 62                          |
| Comovirinae   | Comovirus   | CowSMV_RNA2     | –        | 3732   | 255 ± 30                          | 315 ± 51                           | 302 ± 49                            | 309 ± 54                          |
| Comovirinae   | Comovirus   | CPMV_RNA1       | 1ny7     | 5889   | 360 ± 24                          | 423 ± 66                           | 415 ± 66                            | 439 ± 72                          |
| Comovirinae   | Comovirus   | RadMV_RNA1      | –        | 6064   | 357 ± 21                          | 427 ± 67                           | 422 ± 63                            | 431 ± 73                          |
| Comovirinae   | Comovirus   | RadMV_RNA2      | –        | 4020   | 274 ± 20                          | 329 ± 53                           | 315 ± 52                            | 323 ± 50                          |
| Comovirinae   | Comovirus   | RCMV_RNA1       | rcmv     | 6033   | 396 ± 28                          | 420 ± 65                           | 410 ± 59                            | 417 ± 61                          |
| Comovirinae   | Comovirus   | SquashMV_RNA1   | –        | 5865   | 474 ± 27                          | 419 ± 69                           | 419 ± 70                            | 436 ± 71                          |
| Comovirinae   | Comovirus   | SquashMV_RNA2   | –        | 3354   | 226 ± 17                          | 285 ± 48                           | 291 ± 49                            | 288 ± 45                          |
| Comovirinae   | Comovirus   | TurRV_RNA1      | –        | 6082   | 403 ± 32                          | 440 ± 70                           | 434 ± 70                            | 439 ± 63                          |
| Comovirinae   | Comovirus   | TurRV_RNA2      | –        | 3985   | 256 ± 18                          | 325 ± 52                           | 304 ± 49                            | 298 ± 46                          |
| Comovirinae   | Fabavirus   | BBWV_RNA1       | –        | 5817   | 542 ± 37                          | 422 ± 68                           | 428 ± 64                            | 444 ± 74                          |
| Comovirinae   | Fabavirus   | BBWV_RNA2       | –        | 3446   | 260 ± 24                          | 305 ± 49                           | 303 ± 46                            | 307 ± 49                          |
| Comovirinae   | Fabavirus   | mikaniaMMV_RNA1 | –        | 5862   | 505 ± 46                          | 433 ± 69                           | 450 ± 67                            | 443 ± 73                          |

|                |              |                 |      |       |          |          |          |          |
|----------------|--------------|-----------------|------|-------|----------|----------|----------|----------|
| Comovirinae    | Fabavirus    | mikaniaMMV_RNA2 | –    | 3418  | 259 ± 30 | 303 ± 49 | 289 ± 47 | 285 ± 51 |
| Comovirinae    | Fabavirus    | patchMMV_RNA1   | –    | 5956  | 539 ± 24 | 440 ± 70 | 428 ± 68 | 438 ± 62 |
| Comovirinae    | Fabavirus    | patchMMV_RNA2   | –    | 3591  | 262 ± 32 | 320 ± 51 | 313 ± 51 | 316 ± 55 |
| Comovirinae    | Nepovirus    | arabismV_RNA1   | –    | 7334  | 318 ± 30 | 485 ± 74 | 475 ± 78 | 468 ± 73 |
| Comovirinae    | Nepovirus    | arabismV_RNA2   | –    | 3820  | 207 ± 20 | 323 ± 53 | 307 ± 47 | 319 ± 45 |
| Comovirinae    | Nepovirus    | blackCRV_RNA1   | –    | 7711  | 306 ± 31 | 502 ± 75 | 486 ± 76 | 488 ± 78 |
| Comovirinae    | Nepovirus    | blackCRV_RNA2   | –    | 6405  | 315 ± 22 | 445 ± 67 | 418 ± 65 | 417 ± 71 |
| Comovirinae    | Nepovirus    | raspRV_RNA1     | –    | 7935  | 404 ± 39 | 528 ± 83 | 520 ± 81 | 539 ± 81 |
| Comovirinae    | Nepovirus    | raspRV_RNA2     | –    | 3914  | 203 ± 13 | 318 ± 50 | 317 ± 53 | 319 ± 48 |
| Comovirinae    | Nepovirus    | TRSV_RNA2       | 1a6c | 7271  | 257 ± 20 | 500 ± 80 | 484 ± 75 | 502 ± 84 |
| Flaviviridae   | Flavivirus   | alkhurma        | –    | 10685 | 714 ± 36 | 659 ± 10 | 651 ± 10 | 646 ± 96 |
| Flaviviridae   | Flavivirus   | apoi            | –    | 10116 | 484 ± 38 | 612 ± 96 | 626 ± 97 | 615 ± 88 |
| Flaviviridae   | Flavivirus   | dengue          | –    | 10735 | 589 ± 45 | 654 ± 99 | 634 ± 98 | 586 ± 96 |
| Flaviviridae   | Flavivirus   | montana         | –    | 10690 | 588 ± 34 | 649 ± 99 | 652 ± 10 | 628 ± 92 |
| Flaviviridae   | Flavivirus   | powassan        | –    | 10839 | 674 ± 52 | 668 ± 10 | 663 ± 97 | 656 ± 95 |
| Flaviviridae   | Flavivirus   | rioBravo        | –    | 10140 | 520 ± 79 | 631 ± 10 | 635 ± 98 | 618 ± 91 |
| Flaviviridae   | Hepacivirus  | HepC2           | –    | 9711  | 443 ± 36 | 617 ± 10 | 595 ± 86 | 604 ± 96 |
| Flaviviridae   | Hepacivirus  | HepC5           | –    | 9343  | 538 ± 88 | 585 ± 97 | 586 ± 91 | 580 ± 86 |
| Flaviviridae   | Hepacivirus  | HepC6           | –    | 9628  | 440 ± 25 | 601 ± 92 | 607 ± 93 | 599 ± 95 |
| Flaviviridae   | Pestivirus   | border          | –    | 12333 | 560 ± 38 | 681 ± 10 | 688 ± 10 | –        |
| Flaviviridae   | Pestivirus   | BVDV1           | –    | 12573 | 547 ± 30 | 692 ± 10 | 684 ± 10 | –        |
| Flaviviridae   | Pestivirus   | classicalSFV    | –    | 12301 | 617 ± 61 | 675 ± 10 | 667 ± 98 | –        |
| Flaviviridae   | Pestivirus   | pestiGiraffe    | –    | 12602 | 598 ± 70 | 693 ± 11 | 684 ± 10 | –        |
| Picornaviridae | Aphthovirus  | BovRBV          | –    | 7556  | 375 ± 36 | 486 ± 76 | 474 ± 77 | 444 ± 68 |
| Picornaviridae | Aphthovirus  | ERAV            | 2wff | 7734  | 430 ± 33 | 508 ± 81 | 483 ± 75 | 518 ± 82 |
| Picornaviridae | Aphthovirus  | FMDV_type0      | 1zba | 8134  | 406 ± 31 | 521 ± 81 | 517 ± 79 | 504 ± 86 |
| Picornaviridae | Cardiovirus  | saffold         | –    | 8115  | 487 ± 36 | 523 ± 82 | 504 ± 78 | 485 ± 73 |
| Picornaviridae | Cardiovirus  | TMEVlike        | –    | 7961  | 539 ± 37 | 513 ± 82 | 512 ± 84 | 494 ± 76 |
| Picornaviridae | Enterovirus  | BEV             | 1bev | 7414  | 462 ± 47 | 497 ± 79 | 484 ± 76 | 495 ± 88 |
| Picornaviridae | Enterovirus  | Hentero107      | –    | 7423  | 539 ± 31 | 487 ± 77 | 480 ± 77 | 474 ± 71 |
| Picornaviridae | Enterovirus  | Hrhino14        | 1d3i | 7212  | 419 ± 17 | 458 ± 73 | 449 ± 71 | 437 ± 63 |
| Picornaviridae | Erbovirus    | ERBV1           | –    | 8828  | 393 ± 27 | 548 ± 90 | 549 ± 86 | 538 ± 80 |
| Picornaviridae | Kobuvirus    | aichi           | –    | 8251  | 235 ± 20 | 508 ± 79 | 491 ± 78 | 421 ± 63 |
| Picornaviridae | Kobuvirus    | bovineKV        | –    | 8374  | 405 ± 28 | 533 ± 82 | 539 ± 79 | 470 ± 66 |
| Picornaviridae | Kobuvirus    | porcineKV       | –    | 8210  | 266 ± 25 | 516 ± 79 | 499 ± 80 | 445 ± 75 |
| Picornaviridae | Parechovirus | ljungan         | –    | 7590  | 425 ± 36 | 490 ± 77 | 473 ± 75 | 478 ± 73 |
| Picornaviridae | Sapelovirus  | asapelo         | –    | 8289  | 433 ± 38 | 520 ± 82 | 506 ± 77 | 506 ± 75 |
| Picornaviridae | Senecavirus  | SVV             | 3cji | 7310  | 364 ± 24 | 480 ± 76 | 475 ± 76 | 454 ± 72 |
| Picornaviridae | Teschovirus  | ptescho1        | –    | 7117  | 297 ± 23 | 482 ± 78 | 480 ± 73 | 498 ± 84 |
| Picornaviridae | Teschovirus  | AEV             | –    | 7055  | 425 ± 43 | 487 ± 77 | 469 ± 74 | 488 ± 74 |
| Tombusviridae  | Aureusvirus  | MaWLMV          | –    | 4293  | 350 ± 15 | 357 ± 56 | 356 ± 55 | –        |
| Tombusviridae  | Aureusvirus  | pothos          | –    | 4354  | 358 ± 18 | 361 ± 57 | 358 ± 56 | –        |
| Tombusviridae  | Avenavirus   | OCSV            | –    | 4114  | 327 ± 18 | 331 ± 50 | 324 ± 51 | –        |
| Tombusviridae  | Carmovirus   | angelonia       | –    | 3964  | 338 ± 16 | 322 ± 52 | 319 ± 49 | –        |
| Tombusviridae  | Carmovirus   | JapINRV         | –    | 4014  | 326 ± 45 | 331 ± 52 | 327 ± 55 | –        |
| Tombusviridae  | Carmovirus   | Pe1FBV          | –    | 3923  | 266 ± 13 | 336 ± 53 | 327 ± 52 | –        |
| Tombusviridae  | Carmovirus   | TuCrV           | 3zx8 | 4050  | 332 ± 25 | 333 ± 54 | 326 ± 53 | –        |
| Tombusviridae  | Necrovirus   | TNV_A           | 1tnv | 3684  | 269 ± 6  | 298 ± 47 | 296 ± 49 | –        |
| Tombusviridae  | Tombusvirus  | GrALV           | –    | 4731  | 291 ± 22 | 375 ± 59 | 384 ± 60 | –        |
| Tombusviridae  | Tombusvirus  | pearLV          | –    | 4766  | 261 ± 12 | 367 ± 59 | 369 ± 57 | –        |
| Tymoviridae    | Maculavirus  | GFkV            | –    | 7564  | 250 ± 20 | 440 ± 69 | 457 ± 69 | –        |
| Tymoviridae    | Marafivirus  | GVSV1           | –    | 6506  | 392 ± 36 | 446 ± 68 | 437 ± 67 | –        |
| Tymoviridae    | Marafivirus  | MRFV            | –    | 6305  | 451 ± 23 | 443 ± 67 | 450 ± 71 | –        |
| Tymoviridae    | Marafivirus  | OBV3            | –    | 6509  | 328 ± 35 | 432 ± 72 | 424 ± 61 | –        |
| Tymoviridae    | Marafivirus  | OLV3            | –    | 7148  | 312 ± 27 | 429 ± 67 | 426 ± 68 | –        |
| Tymoviridae    | Tymovirus    | AnVYV           | –    | 6151  | 250 ± 17 | 356 ± 56 | 357 ± 55 | –        |
| Tymoviridae    | Tymovirus    | ChYMV           | –    | 6517  | 217 ± 16 | 357 ± 58 | 339 ± 53 | –        |
| Tymoviridae    | Tymovirus    | DiYMV           | –    | 6290  | 223 ± 26 | 361 ± 56 | 353 ± 55 | –        |
| Tymoviridae    | Tymovirus    | DuMV            | –    | 6181  | 336 ± 44 | 384 ± 60 | 384 ± 59 | –        |
| Tymoviridae    | Tymovirus    | EgMV            | –    | 6331  | 186 ± 18 | 352 ± 57 | 346 ± 53 | –        |
| Tymoviridae    | Tymovirus    | ErLV            | –    | 6035  | 248 ± 24 | 373 ± 60 | 368 ± 59 | –        |
| Tymoviridae    | Tymovirus    | NeRNV           | –    | 6285  | 302 ± 23 | 361 ± 56 | 351 ± 53 | –        |
| Tymoviridae    | Tymovirus    | OkMV            | –    | 6223  | 188 ± 29 | 333 ± 52 | 333 ± 50 | –        |
| Tymoviridae    | Tymovirus    | OnYMV           | –    | 6211  | 247 ± 31 | 384 ± 62 | 373 ± 57 | –        |

|             |           |      |   |      |              |              |              |   |
|-------------|-----------|------|---|------|--------------|--------------|--------------|---|
| Tymoviridae | Tymovirus | P1MV | – | 6154 | $369 \pm 26$ | $393 \pm 61$ | $389 \pm 64$ | – |
| Tymoviridae | Tymovirus | ScMV | – | 6206 | $217 \pm 18$ | $348 \pm 54$ | $343 \pm 53$ | – |

SI Table I: **Set Viral genomes used in this study, including genome length and average MLD values.**  $\langle MLD_{WT} \rangle$  refers to thermal average of the MLD obtained on WT sequences.  $\langle MLD_{mut} \rangle$ ,  $\langle MLD_{UTRs} \rangle$ ,  $\langle MLD_{CB} \rangle$ , refer to average MLD values obtained on synonymously mutated sequences, synonymously mutated sequences with preserved UTRs, and synonymously mutated sequences with preserved UTRs and codon bias, respectively (see Material and Methods in the main text); in these cases an additional averaging over a wide set of possible mutations is performed. Errors are reported as standard deviations.
